# Supplementary material for: Characteristics and Treatment Outcomes of Isoniazid Mono-Resistant Tuberculosis: A Retrospective Study
Source: PubMed Central journal article supplement — Yonsei Med J. 2020 Nov 25;61(12):1034–41. doi: 10.3349/ymj.2020.61.12.1034 (PMC7700875; doi:10.3349/ymj.2020.61.12.1034), 2020-11-25
Supplement: ymj-61-1034-s001.pdf [file ymj-61-1034-s001.pdf]

**Supplementary Table 1.** Characteristics of Relapsed Patients after Successful Initial Treatment

| <b>A. Patient and disease factors</b> |     |     |      |                       |         |     |              |          |          |          |            |                   |
|---------------------------------------|-----|-----|------|-----------------------|---------|-----|--------------|----------|----------|----------|------------|-------------------|
| No.                                   | Age | Sex | BMI  | Comorbidity           | History |     | Disease site | AFB      |          | Cavitary | DST        |                   |
|                                       |     |     |      |                       | Smoking | TB  |              | Baseline | 2 mon    |          | Phenotypic | Molecular         |
| 1                                     | 39  | F   | 20.6 | -                     | No      | No  | Pul+Extra    | Negative | Negative | No       | Low-level  | No mutation       |
| 2                                     | 40  | F   | 16.7 | DM                    | Yes     | No  | Pul          | Positive | Negative | Yes      | High-level | <i>inhA</i>       |
| 3                                     | 47  | M   | 17.9 | Behcet's disease, NTM | Yes     | No  | Pul          | Positive | Positive | No       | High-level | Not done          |
| 4                                     | 50  | M   | 17.5 | -                     | Yes     | Yes | Pul          | Positive | Negative | Yes      | High-level | <i>katG, inhA</i> |

  

| <b>B. Treatment factors</b> |         |                          |                 |     |       |                                  |                                       |                                  |
|-----------------------------|---------|--------------------------|-----------------|-----|-------|----------------------------------|---------------------------------------|----------------------------------|
| No.                         | Regimen | Treatment duration, days |                 |     |       | Time to regimen change for Hr-TB | Changed or stopped medication d/t A/E | A/E                              |
|                             |         | Hr-TB                    | Fluoroquinolone | PZA | Total |                                  |                                       |                                  |
| 1                           | HREZ    | 113                      | 0               | 183 | 183   | 70                               | No                                    | No                               |
| 2                           | HREZ    | 355                      | 0               | 385 | 385   | 30                               | No                                    | GI trouble, Hepatitis, Arthritis |
| 3                           | HREQ/SM | 200                      | 200             | 0   | 423   | 223                              | No                                    | GI trouble                       |
| 4                           | HREZQ   | 189                      | 189             | 287 | 287   | 98                               | No                                    | GI trouble, Rash, Arthritis      |

BMI, body mass index; TB, tuberculosis; AFB, acid-fast bacillus; DST, drug-susceptibility test; Pul, pulmonary; Extra, extra-pulmonary; DM, diabetes mellitus; NTM, nontuberculous mycobacteria; Hr-TB, isoniazid-resistant tuberculosis; PZA, pyrazinamide; d/t, due to; A/E, adverse events; H, isoniazid; R, rifampicin; E, ethambutol; Z, pyrazinamide; Q, fluoroquinolone; SM, streptomycin; GI, gastrointestinal.
