# Supplementary material for: Characteristics and Treatment Outcomes of Isoniazid Mono-Resistant Tuberculosis: A Retrospective Study
Source: PubMed Central journal article supplement — Yonsei Med J. 2020 Nov 25;61(12):1034–41. doi: 10.3349/ymj.2020.61.12.1034 (PMC7700875; doi:10.3349/ymj.2020.61.12.1034), 2020-11-25
Supplement: ymj-61-1034-s002.pdf [file ymj-61-1034-s002.pdf]

**Supplementary Table 2.** Comparison of Patients with Favorable Versus Unfavorable Outcomes

| Variables                              | Total (n=195)        | Outcomes             |                       | p value |
|----------------------------------------|----------------------|----------------------|-----------------------|---------|
|                                        |                      | Favorable (n=164)    | Unfavorable (n=31)    |         |
| <b>Patient factors</b>                 |                      |                      |                       |         |
| Age (yr)                               | 56.6 (40.2–68.6)     | 56.0 (36.8–67.7)     | 62.0 (48.8–74.2)      | 0.073   |
| Sex, male                              | 113 (57.9)           | 91 (55.5)            | 22 (71.0)             | 0.118   |
| Body mass index, kg/m <sup>2</sup>     | 20.8 (19.2–23.1)     | 20.8 (19.3–23.1)     | 20.7 (18.6–22.8)      | 0.965   |
| <b>Underlying disease</b>              |                      |                      |                       |         |
| Hypertension                           | 56 (28.7)            | 43 (26.2)            | 13 (41.9)             | 0.086   |
| Diabetes mellitus                      | 38 (19.5)            | 31 (18.9)            | 7 (22.6)              | 0.626   |
| Malignancy                             | 35 (17.9)            | 24 (14.6)            | 11 (35.5)             | 0.010   |
| Respiratory disease                    | 31 (15.9)            | 29 (17.7)            | 2 (6.5)               | 0.178   |
| Chronic kidney disease                 | 13 (6.7)             | 8 (4.9)              | 5 (16.1)              | 0.037   |
| Immunocompromised*                     | 12 (6.2)             | 9 (5.5)              | 3 (9.7)               | 0.410   |
| Smoking history                        | 72 (36.9)            | 51 (31.1)            | 21 (67.7)             | <0.001  |
| Prior history of TB treatment          | 54 (27.7)            | 42 (25.6)            | 12 (38.7)             | 0.188   |
| Total protein level, g/dL              | 7.0 (6.7–7.4)        | 7.1 (6.8–7.4)        | 6.7 (5.9–7.4)         | 0.018   |
| Albumin level, g/dL                    | 4.0 (3.6–4.3)        | 4.0 (3.7–4.4)        | 3.2 (2.7–4.0)         | <0.001  |
| <b>Disease factors</b>                 |                      |                      |                       |         |
| Disease site                           |                      |                      |                       | 0.229   |
| Pulmonary                              | 182 (93.3)           | 151 (92.1)           | 31 (100.0)            |         |
| Extra-pulmonary                        | 13 (6.7)             | 13 (7.9)             | 0                     |         |
| <b>Disease severity</b>                |                      |                      |                       |         |
| Baseline positive AFB smear            | 61 (31.3)            | 49 (29.9)            | 12 (38.7)             | 0.398   |
| Positive AFB culture at 1 months       | 26 (13.3)            | 19 (11.6)            | 7 (22.6)              | 0.144   |
| Positive AFB culture at 2 months       | 9 (4.6)              | 4 (2.4)              | 5 (16.1)              | 0.006   |
| Cavitary lesions in chest radiography  | 51 (27.0)            | 40 (25.2)            | 11 (36.7)             | 0.261   |
| Phenotypic DST                         |                      |                      |                       | 0.830   |
| High-level resistance                  | 138 (70.8)           | 115 (70.1)           | 23 (74.2)             |         |
| Low-level resistance                   | 57 (29.2)            | 49 (29.9)            | 8 (25.8)              |         |
| <b>Rapid molecular DST</b>             |                      |                      |                       |         |
| Done                                   | 145 (74.4)           | 120 (73.2)           | 25 (80.6)             | 0.503   |
| Mutation                               | 122 (84.1)           | 104 (86.7)           | 18 (72.0)             | 0.078   |
| <b>Treatment factors</b>               |                      |                      |                       |         |
| <b>Drug regimen composition</b>        |                      |                      |                       |         |
| Fluoroquinolone use                    | 69 (35.4)            | 59 (36.0)            | 10 (32.3)             | 0.838   |
| Injectable agents use                  | 12 (6.2)             | 11 (6.7)             | 1 (3.2)               | 0.695   |
| <b>Treatment duration, days</b>        |                      |                      |                       |         |
| Hr-TB treatment duration <sup>†</sup>  | 211.0 (124.0–273.0)  | 221.0 (162.5–287.8)  | 38.0 (0.0–119.0)      | <0.001  |
| Fluoroquinolone treatment duration     | 249.0 (185.0–312.0)  | 255.0 (213.5–327.5)  | 129.0 (48.3–195.0)    | 0.002   |
| PZA treatment duration                 | 209.0 (102.0–281.0)  | 268.5 (180.3–288.5)  | 60.0 (28.0–183.0)     | <0.001  |
| Treatment duration <sup>‡</sup>        | 273.0 (187.0–342.0)  | 275.0 (210.8–362.8)  | 102.0 (38.0–199.0)    | <0.001  |
| Altered Hr-TB regimen after full DST   | 102 (52.3)           | 81 (49.4)            | 21 (67.7)             | 0.097   |
| Time to regimen change for Hr-TB       | 60.0 (36.5–84.5)     | 62.0 (38.5–85.0)     | 50.0 (35.5–72.0)      | 0.927   |
| Length of follow-up, <sup>§</sup> days | 871.0 (472.5–1782.5) | 845.0 (469.0–1691.0) | 1628.0 (796.5–2834.0) | 0.167   |
| <b>Adverse events</b>                  |                      |                      |                       |         |
| GI trouble                             | 154 (79.0)           | 130 (79.3)           | 24 (77.4)             | 0.812   |
| Rash                                   | 89 (45.6)            | 75 (45.7)            | 14 (45.2)             | 1.000   |
| Arthritis                              | 85 (43.6)            | 75 (45.7)            | 10 (32.3)             | 0.236   |
| Drug-induced hepatitis                 | 56 (28.7)            | 48 (29.3)            | 8 (25.8)              | 0.830   |
| Drug-induced hepatitis                 | 23 (11.8)            | 15 (9.1)             | 8 (25.8)              | 0.015   |
| Hematologic abnormalities              | 7 (3.6)              | 7 (4.3)              | 0                     | 0.600   |
| Peripheral neuropathy                  | 9 (4.6)              | 6 (3.7)              | 3 (9.7)               | 0.156   |

TB, tuberculosis; AFB, acid-fast bacillus; DST, drug-susceptibility test; Hr-TB, isoniazid-resistant tuberculosis; PZA, pyrazinamide; GI, gastrointestinal.

Data are presented as numbers (%) or medians (IQR).

\*Immunocompromised patients: 1) hematopoietic cell transplant recipients, 2) other solid organ transplant recipients, and (3) patients who received any immunosuppressive treatments (e.g., biologic agents targeting inflammatory mediators or corticosteroid therapy), <sup>†</sup>Hr-TB treatment duration: time from the initiation of Hr-TB treatment to its completion, <sup>‡</sup>Treatment duration: time from the initiation to the completion of TB treatment, <sup>§</sup>Length of follow-up: time from the initiation of TB treatment to the last follow-up.
